# Supplementary material for: Cancer Survivors’ Long-Term Health Service Costs in Queensland, Australia: Results of a Population-Level Data Linkage Study (Cos-Q)
Source: MDPI journal article supplement (doi:10.3390/ijerph19159473), 2022-08-02
Supplement: s1 [file s1]

## Supplementary Material

**Table S1.** Mean annual Healthcare Costs (2013-16) in AU\$ per Person by Age Group and Survivorship Status (Patient-level & Cohort-level)

| Age group<br>(years) | Alive   |                         |        | Deceased |                         |         | Total cost |      |                         |        |                            | % of<br>total<br>cost |
|----------------------|---------|-------------------------|--------|----------|-------------------------|---------|------------|------|-------------------------|--------|----------------------------|-----------------------|
|                      | N       | Mean cost<br>per person | SD     | N        | Mean cost<br>per person | SD      | N          | %    | Mean cost<br>per person | SD     | Sum of costs<br>for cohort |                       |
| 0-4                  | 796     | \$24,197                | 63,547 | 24       | \$77,804                | 59,553  | 820        | 0.4  | \$ 25,766               | 64,041 | \$21,128,116               | 0.6                   |
| 5-9                  | 492     | \$22,287                | 42,571 | 16       | \$97,311                | 78,289  | 508        | 0.2  | \$ 24,651               | 45,918 | \$12,522,478               | 0.3                   |
| 10-14                | 561     | \$20,993                | 46,980 | 16       | \$121,273               | 111,510 | 577        | 0.3  | \$ 23,774               | 52,356 | \$13,717,399               | 0.4                   |
| 15-19                | 1,238   | \$13,958                | 39,867 | 27       | \$71,327                | 68,381  | 1,265      | 0.5  | \$ 15,183               | 41,478 | \$19,206,505               | 0.5                   |
| 20-24                | 2,075   | \$8,865                 | 28,658 | 43       | \$59,061                | 59,123  | 2,118      | 0.9  | \$ 9,884                | 30,399 | \$20,933,600               | 0.6                   |
| 25-29                | 3,450   | \$8,168                 | 18,546 | 79       | \$58,746                | 46,754  | 3,529      | 1.5  | \$ 9,300                | 20,990 | \$32,821,302               | 0.9                   |
| 30-34                | 5,037   | \$8,645                 | 19,033 | 142      | \$56,035                | 45,030  | 5,179      | 2.2  | \$ 9,944                | 21,620 | \$51,501,098               | 1.4                   |
| 35-39                | 7,316   | \$9,388                 | 18,757 | 240      | \$55,607                | 52,387  | 7,556      | 3.3  | \$ 10,856               | 22,207 | \$82,029,050               | 2.2                   |
| 40-44                | 10,709  | \$10,386                | 20,259 | 443      | \$51,660                | 46,010  | 11,152     | 4.8  | \$ 12,026               | 23,303 | \$134,113,230              | 3.7                   |
| 45-49                | 15,359  | \$10,437                | 19,740 | 727      | \$47,379                | 39,669  | 16,086     | 7.0  | \$ 12,107               | 22,405 | \$194,748,360              | 5.3                   |
| 50-54                | 20,649  | \$11,412                | 21,058 | 1,333    | \$46,776                | 45,604  | 21,982     | 9.5  | \$ 13,556               | 24,775 | \$297,990,983              | 8.1                   |
| 55-59                | 25,875  | \$12,440                | 20,838 | 1,989    | \$43,310                | 39,549  | 27,864     | 12.1 | \$ 14,643               | 24,042 | \$408,020,598              | 11.1                  |
| 60-64                | 29,421  | \$13,556                | 21,560 | 2,733    | \$41,385                | 37,647  | 32,154     | 14.0 | \$ 15,921               | 24,617 | \$511,938,583              | 14.0                  |
| 65-69                | 29,825  | \$14,908                | 21,668 | 3,689    | \$38,607                | 37,331  | 33,514     | 14.5 | \$ 17,517               | 25,024 | \$587,068,806              | 16.0                  |
| 70-74                | 22,372  | \$16,575                | 21,687 | 4,093    | \$35,329                | 37,131  | 26,465     | 11.5 | \$ 19,475               | 25,628 | \$515,413,796              | 14.1                  |
| 75-79                | 15,058  | \$17,446                | 21,139 | 4,073    | \$30,082                | 32,582  | 19,131     | 8.3  | \$ 20,137               | 24,586 | \$385,233,265              | 10.5                  |
| 80-84                | 8,244   | \$17,608                | 20,742 | 3,497    | \$24,276                | 28,901  | 11,741     | 5.1  | \$ 19,597               | 23,667 | \$230,089,549              | 6.3                   |
| 85-89                | 3,738   | \$16,355                | 20,904 | 2,424    | \$18,942                | 28,134  | 6,162      | 2.7  | \$ 17,373               | 24,041 | \$107,051,153              | 2.9                   |
| 90+                  | 1,280   | \$14,493                | 20,372 | 1,297    | \$12,810                | 19,144  | 2,577      | 1.1  | \$ 13,646               | 19,777 | \$35,166,203               | 1.0                   |
| Total                | 203,495 | \$13,509                | 21,899 | 26,885   | \$33,912                | 37,064  | 230,380    | 100  | \$ 15,890               | 25,036 | \$3,660,694,073            | 100                   |

**Table S2.** Mean Annual Healthcare Costs (2013-16) in AU\$ per Person by Type of Cancer and Health Service Component (Patient-level).

| Type of cancer<br>(ICD-O3 code)       | Total N | Mean<br>cost per<br>person | SD     | Hospitalisations (public) |      |              |        | Pharmaceuticals |      |              |        | Medicare Services |      |           |       | Emergency Admissions |      |              |       |
|---------------------------------------|---------|----------------------------|--------|---------------------------|------|--------------|--------|-----------------|------|--------------|--------|-------------------|------|-----------|-------|----------------------|------|--------------|-------|
|                                       |         |                            |        | N                         | %    | Mean<br>cost | SD     | N               | %    | Mean<br>cost | SD     | N                 | %    | Mean cost | SD    | N                    | %    | Mean<br>cost | SD    |
| Esophageal (C15)                      | 1,200   | \$26,268                   | 35,401 | 801                       | 66.8 | \$26,062     | 39,180 | 1,172           | 97.7 | \$1,948      | 2,759  | 1,139             | 94.9 | \$ 6,208  | 7,184 | 740                  | 61.7 | \$1,747      | 1,510 |
| Stomach (C16)                         | 1,941   | \$23,616                   | 27,542 | 1,240                     | 63.9 | \$24,214     | 28,950 | 1,890           | 97.4 | \$2,590      | 5,775  | 1,841             | 94.8 | \$ 4,805  | 5,869 | 1,185                | 61.1 | \$1,749      | 1,568 |
| Colorectal (C18-20)                   | 26,646  | \$17,858                   | 25,155 | 14,452                    | 54.2 | \$18,659     | 26,744 | 26,139          | 98.1 | \$3,123      | 7,322  | 25,790            | 96.8 | \$ 4,022  | 4,559 | 13,822               | 51.9 | \$1,508      | 1,372 |
| Pancreatic (C25)                      | 1,819   | \$27,185                   | 31,554 | 1,221                     | 67.1 | \$24,513     | 33,950 | 1,752           | 96.3 | \$4,262      | 6,361  | 1,693             | 93.1 | \$ 5,880  | 6,745 | 1,127                | 62.0 | \$1,861      | 1,721 |
| Lung (C33-34)                         | 8,750   | \$26,651                   | 27,018 | 6,459                     | 73.8 | \$23,119     | 26,291 | 8,390           | 95.9 | \$3,559      | 5,992  | 8,140             | 93.0 | \$ 5,210  | 5,850 | 5,798                | 66.3 | \$2,001      | 1,793 |
| Melanoma (C44, M872-M879)             | 40,655  | \$9,487                    | 19,092 | 14,847                    | 36.5 | \$12,126     | 22,495 | 39,327          | 96.7 | \$2,012      | 8,005  | 39,876            | 98.1 | \$ 2,676  | 3,107 | 16,096               | 39.6 | \$1,232      | 1,136 |
| Breast (C50)                          | 37,745  | \$13,140                   | 18,244 | 16,390                    | 43.4 | \$13,057     | 19,403 | 37,170          | 98.5 | \$3,011      | 6,217  | 37,165            | 98.5 | \$ 4,011  | 4,125 | 16,318               | 43.2 | \$1,285      | 1,181 |
| Cervical (C53)                        | 2,266   | \$12,433                   | 19,912 | 1,093                     | 48.2 | \$16,338     | 21,860 | 2,181           | 96.2 | \$1,185      | 2,937  | 2,227             | 98.3 | \$ 2,762  | 4,068 | 1,103                | 48.7 | \$1,434      | 1,370 |
| Uterine (C54)                         | 4,893   | \$11,988                   | 17,882 | 2,239                     | 45.8 | \$14,785     | 21,049 | 4,808           | 98.3 | \$1,471      | 2,805  | 4,811             | 98.3 | \$ 3,205  | 3,568 | 2,204                | 45.0 | \$1,387      | 1,267 |
| Ovarian (C56)                         | 1,997   | \$18,710                   | 23,649 | 1,007                     | 50.4 | \$19,158     | 24,968 | 1,940           | 97.1 | \$3,540      | 5,397  | 1,932             | 96.7 | \$ 4,916  | 5,625 | 1,000                | 50.1 | \$1,706      | 4,740 |
| Prostate (C61)                        | 40,988  | \$13,119                   | 19,470 | 18,399                    | 44.9 | \$13,985     | 22,676 | 40,446          | 98.7 | \$2,528      | 5,391  | 39,833            | 97.2 | \$ 3,824  | 3,794 | 18,477               | 45.1 | \$1,398      | 1,275 |
| Kidney (C64-66, C68)                  | 6,016   | \$16,470                   | 23,377 | 3,248                     | 54.0 | \$17,082     | 24,659 | 5,893           | 98.0 | \$3,016      | 6,760  | 5,841             | 97.1 | \$ 3,568  | 3,919 | 3,234                | 53.8 | \$1,543      | 1,481 |
| Bladder (C67)                         | 3,574   | \$18,856                   | 27,765 | 2,193                     | 61.4 | \$19,661     | 31,315 | 3,520           | 98.5 | \$1,861      | 3,443  | 3,389             | 94.8 | \$ 4,230  | 4,899 | 2,029                | 56.8 | \$1,669      | 1,529 |
| Brain (C70-72)                        | 1,849   | \$30,264                   | 37,161 | 1,199                     | 64.8 | \$29,873     | 38,923 | 1,790           | 96.8 | \$3,863      | 5,382  | 1,800             | 97.3 | \$ 6,114  | 7,311 | 1,201                | 65.0 | \$1,849      | 1,580 |
| Thyroid (C73)                         | 6,098   | \$8,801                    | 15,276 | 2,483                     | 40.7 | \$11,522     | 19,376 | 6,026           | 98.8 | \$1,110      | 3,013  | 6,019             | 98.7 | \$ 2,622  | 2,883 | 2,362                | 38.7 | \$1,097      | 935   |
| Non-Hodgkin Lymphoma (M959, M967-971) | 7,700   | \$24,397                   | 33,634 | 3,947                     | 51.3 | \$22,573     | 34,981 | 7,533           | 97.8 | \$7,063      | 10,528 | 7,492             | 97.3 | \$ 5,250  | 7,326 | 3,953                | 51.3 | \$1,573      | 1,485 |
| Leukemia (M980-M994)                  | 6,308   | \$29,158                   | 44,390 | 3,395                     | 53.8 | \$28,543     | 47,525 | 6,131           | 97.2 | \$8,273      | 15,130 | 6,119             | 97.0 | \$ 4,951  | 7,601 | 3,470                | 55.0 | \$1,732      | 1,582 |
| Myeloma (M973)                        | 2,201   | \$45,951                   | 39,499 | 1,398                     | 63.5 | \$28,057     | 33,187 | 2,170           | 98.6 | \$19,657     | 20,772 | 2,143             | 97.4 | \$ 7,914  | 8,986 | 1,282                | 58.2 | \$1,793      | 1,585 |

|                                 |                |                  |               |                |             |                 |               |                |             |                |              |                |             |                 |              |                |             |                |              |       |
|---------------------------------|----------------|------------------|---------------|----------------|-------------|-----------------|---------------|----------------|-------------|----------------|--------------|----------------|-------------|-----------------|--------------|----------------|-------------|----------------|--------------|-------|
| Unknown                         |                |                  |               |                |             |                 |               |                |             |                |              |                |             |                 |              |                |             |                |              |       |
| primary site<br>(C80)           | 2,303          | \$20,651         | 26,491        | 1,424          | 61.8        | \$19,179        | 23,214        | 2,120          | 92.1        | \$4,252        | 13,318       | 2,034          | 88.3        | \$              | 4,499        | 5,081          | 1,282       | 55.7           | \$1,626      | 1,429 |
| Head & neck<br>(C01-14, C30-32) | 6,323          | \$20,525         | 29,892        | 4,220          | 66.7        | \$20,861        | 31,665        | 6,173          | 97.6        | \$1,907        | 4,321        | 6,136          | 97.0        | \$              | 3,985        | 4,175          | 3,576       | 56.6           | \$1,545      | 1,382 |
| Liver (C22)                     | 1,342          | \$29,619         | 37,306        | 1,038          | 77.3        | \$24,878        | 35,798        | 1,266          | 94.3        | \$6,036        | 13,723       | 1,241          | 92.5        | \$              | 3,609        | 4,459          | 920         | 68.6           | \$1,962      | 1,881 |
| Other                           | 17,766         | \$17,739         | 31,207        | 9,127          | 51.4        | \$20,092        | 35,212        | 17,163         | 96.6        | \$3,185        | 7,896        | 17,281         | 97.3        | \$              | 3,628        | 5,082          | 9,241       | 52.0           | \$1,560      | 1,510 |
| <b>Total</b>                    | <b>230,380</b> | <b>\$ 15,890</b> | <b>25,036</b> | <b>111,820</b> | <b>48.6</b> | <b>\$17,297</b> | <b>27,542</b> | <b>225,000</b> | <b>97.7</b> | <b>\$3,127</b> | <b>7,746</b> | <b>223,942</b> | <b>97.2</b> | <b>\$ 3,843</b> | <b>4,635</b> | <b>110,420</b> | <b>47.9</b> | <b>\$1,471</b> | <b>1,448</b> |       |
